# Supplementary material for: Acid induced fluorinated graphene oxide
Source: Royal Society of Chemistry journal article supplement (doi:10.1039/c4ra13884h), 2015-01-01
Supplement: c4ra13884h1.pdf [file c4ra13884h1.pdf]

### More about the mechanism

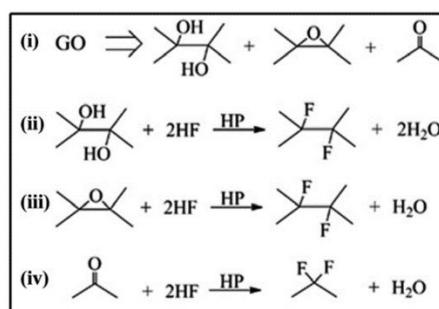

Figure S1: The possible fluorination mechanism in *Carbon*, 2012, 50, 5403-5410.

### Experimental details

#### Materials

Graphite flakes (>99.99%, 325 mesh, Alfa Asea),  $\text{HNO}_3$  (~65%),  $\text{HF}$  (~47%) and all other chemicals are of analytic grade and were used directly as received without any further purification.

#### Synthesis of graphene oxide

GO was prepared following a modified Hummers method. Graphite flake (2.0 g) and  $\text{NaNO}_3$  (1.0 g) were added to concentrated  $\text{H}_2\text{SO}_4$  (46 mL) under vigorous stirring in an ice bath. Then  $\text{KMnO}_4$  (9.0 g) was gradually added while the temperature of the suspension was kept below 20 °C. Successively, the reaction system was warmed to a 40 °C and vigorously stirred for 2 h. Then, 92 mL water was added slowly producing a large exotherm to 98 °C, and the reaction system was maintained at 98 °C for 30 min with external heating introduced. Then 280 mL water and 20 mL  $\text{H}_2\text{O}_2$  (30%) was added, and the color of the solution turned to yellow from dark brown. After cooling down to room temperature, the mixture was filtered and washed with  $\text{HCl}$  (5%) three times and washed with water until sulfate could not be detected. This was then dispersed in water under ultrasonic and centrifuged at 9000 rpm/min for 5 min. The decanted supernatant was dried to obtain the graphene oxide solid.

#### Synthesis of fluorinated graphene oxide

50 mg GO was dispersed in 40 mL ultrapure water under ultrasonic, then centrifuged to remove any insoluble substances. The supernatant was transferred into a 50 mL Teflon-lined stainless steel autoclave, then 5 mL concentrated  $\text{HNO}_3$  and 5 mL  $\text{HF}$  was added while gently stirring. The autoclave was heated at 180 °C for 12 hours and naturally cooled to room temperature. The resultant solution was directly evaporated to dryness in water bath and the solids as prepared are fluorinated graphene oxide denoted as FGO. Control sample denoted as NGO was synthesized following the same process except that 5 mL ultrapure water was substituted for 5 mL concentrated  $\text{HNO}_3$ .

#### Materials characterization

The structure of FGO was characterized with transmission electron microscope (TEM, JEM-2100F). X-ray photoelectron spectroscopy (XPS, ESCALAB 250Xi, ThermoFisher-VG Scientific) was performed with a monochromated  $\text{Al-K}\alpha$  X-ray source. The Fourier-transform infrared (FTIR, ET 6700, Thermo Scientific) spectrum was measured by pressing potassium bromide troche. GO, NGO and FGO were dispersed in ultrapure water at a concentration of  $2\text{mg mL}^{-1}$  for ultraviolet-visible (UV-Vis) absorption spectrometry measurements on UV-1801 spectrophotometer (Beifen-Ruili). The GO dispersion was diluted due to its dark colour.
